# Supplementary material
Source: PubMed Central journal article supplement (PMC2930716)
Supplement: supp_M110.143370_jbc.M110.143370-1.pdf [file supp_M110.143370_jbc.M110.143370-1.pdf]

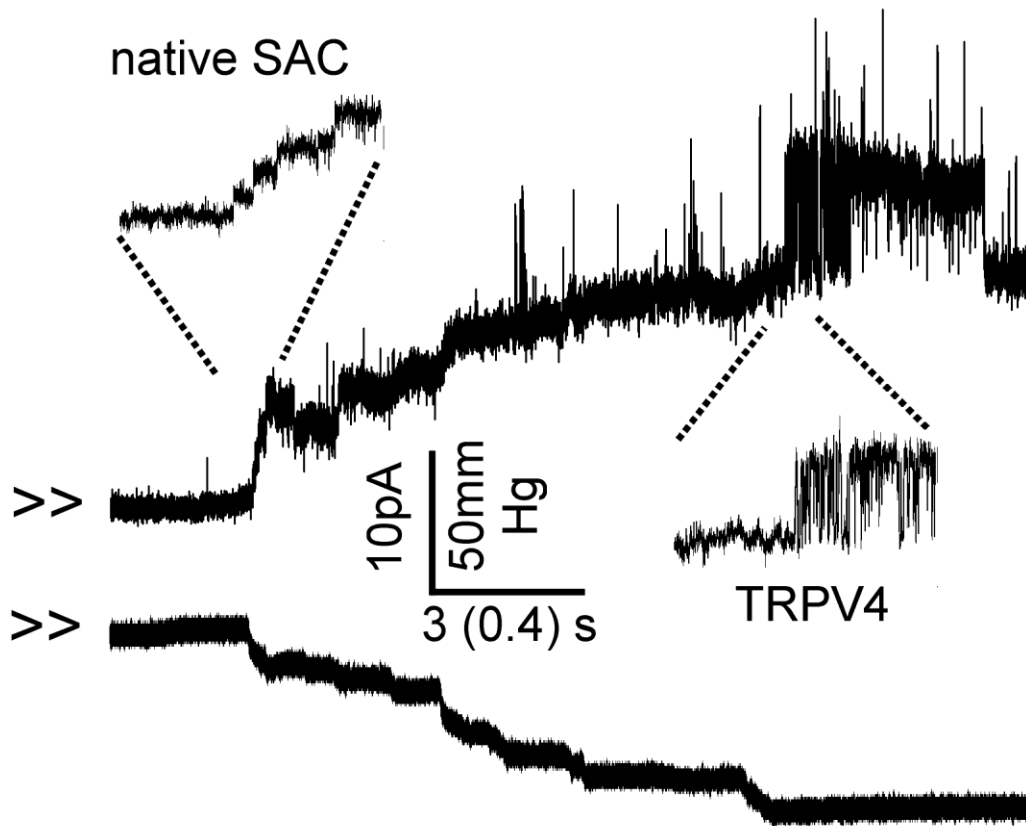

**Supplementary Fig. S1.** TRPV4 activity is distinct from that of the native oocyte stretch-activated channel (SAC). Suction was applied to an excised inside-out patch containing both SAC and TRPV4 held at +80mV membrane potential. While the native channels open at lower suction thresholds and are of smaller conductance (clearest in the expanded trace on left), TRPV4 required greater suction and had a larger unitary conductance (right side of trace).
